# Supplementary material for: Carbazole modification of ruthenium bipyridine–dicarboxylate oxygen evolution molecular catalysts
Source: Royal Society of Chemistry journal article supplement (doi:10.1039/d1dt02824c), 2021-01-01
Supplement: d1dt02824c1.pdf [file d1dt02824c1.pdf]

Supporting Information for

## Carbazole modification of Ruthenium Bipyridine–dicarboxylate Oxygen Evolution Molecular Catalyst

Hiroki Otsuka,<sup>a</sup> Atsushi Kobayashi,<sup>\*a</sup> Masaki Yoshida,<sup>a</sup> and Masako Kato<sup>a,b</sup>

<sup>a</sup>Department of Chemistry, Faculty of Science, Hokkaido University, North-10 West-8, Kita-ku,  
Sapporo 060-0810, Japan

<sup>b</sup>Department of Applied Chemistry for Environment, School of Biological and Environmental  
Sciences, Kwansai Gakuin University, 2-1 Gakuen, Sanda, Hyogo 669-1337, Japan.

### Contents

|                                                                                                                                                                                                |    |
|------------------------------------------------------------------------------------------------------------------------------------------------------------------------------------------------|----|
| Figure S1. UV-Vis absorption spectra of <b>C0</b> , <b>C1</b> and <b>C2</b> .....                                                                                                              | 3  |
| Figure S2. DPV curves of complexes <b>C0</b> and <b>C0-Br</b> .....                                                                                                                            | 3  |
| Figure S3. Cyclic voltammograms of <b>C0</b> , <b>C1</b> , <b>C2</b> , and cbz-py.....                                                                                                         | 4  |
| Figure S4. Changes of cyclic voltammograms during potential sweep cycles of <b>C1</b> and <b>C2</b> .....                                                                                      | 5  |
| Table S1. MO energies of each complex.....                                                                                                                                                     | 6  |
| Figure S5. Comparison with experimental spectra in dichloromethane/methanol (v/v=9/1) and<br>simulated absorption spectra by TD-DFT calculations of <b>C0</b> , <b>C1</b> and <b>C2</b> . .... | 7  |
| Table S2. Wavelength, oscillator strength and contributions of major spin-allowed transitions of<br><b>C0</b> .....                                                                            | 8  |
| Figure S6. Schematic molecular orbital diagrams and orbital shapes of <b>C0</b> in the ground $S_0$ state....                                                                                  | 9  |
| Table S3. Wavelength, oscillator strength and contributions of major spin-allowed transitions of<br><b>C1</b> .....                                                                            | 10 |
| Figure S7. Schematic molecular orbital diagrams and orbital shapes of <b>C1</b> in the ground $S_0$ state....                                                                                  | 11 |
| Table S4. Wavelength, oscillator strength and contributions of major spin-allowed transitions of<br><b>C2</b> .....                                                                            | 12 |
| Figure S8. Schematic molecular orbital diagrams and orbital shapes of <b>C2</b> in the ground $S_0$ state....                                                                                  | 13 |
| Figure S9. Chemical OER plot of <b>C0</b> , <b>C1</b> , and <b>C2</b> under [CAN] range from 60 to 120 mM.....                                                                                 | 14 |
| Figure S10. [Cat.] dependence of OER rate.....                                                                                                                                                 | 15 |
| Figure S11. MALDI-MS spectra of the extract from the reaction mixture of <b>C1</b> .....                                                                                                       | 16 |
| Figure S12. Photochemical OER plots of <b>C2</b> without $[\text{Ru}(\text{bpy})_3]^{2+}$ .....                                                                                                | 16 |
| Figure S13. Photochemical OER plot of <b>C0</b> in the presence of 2 eq. of cbz-H.....                                                                                                         | 17 |
| Figure S14. UV-Vis absorption spectra of reaction mixture after 1 h photolysis for <b>C2</b> , <b>C1</b> and <b>C0</b> ...                                                                     | 17 |
| Figure S15. Photochemical OER plots of <b>C0</b> , <b>C1</b> and <b>C2</b> with $\text{Co}^{\text{III}}$ oxidant.....                                                                          | 18 |

|                                                                                            |    |
|--------------------------------------------------------------------------------------------|----|
| Figure S16. $^1\text{H}$ NMR spectra of <b>C1</b> and <b>C2</b> .....                      | 19 |
| Table S5. Crystallographic parameters of <b>C2</b> ·2CH <sub>2</sub> Cl <sub>2</sub> ..... | 20 |
| Figure S17. ORTEP drawings of. <b>C2</b> ·2CH <sub>2</sub> Cl <sub>2</sub> .....           | 21 |

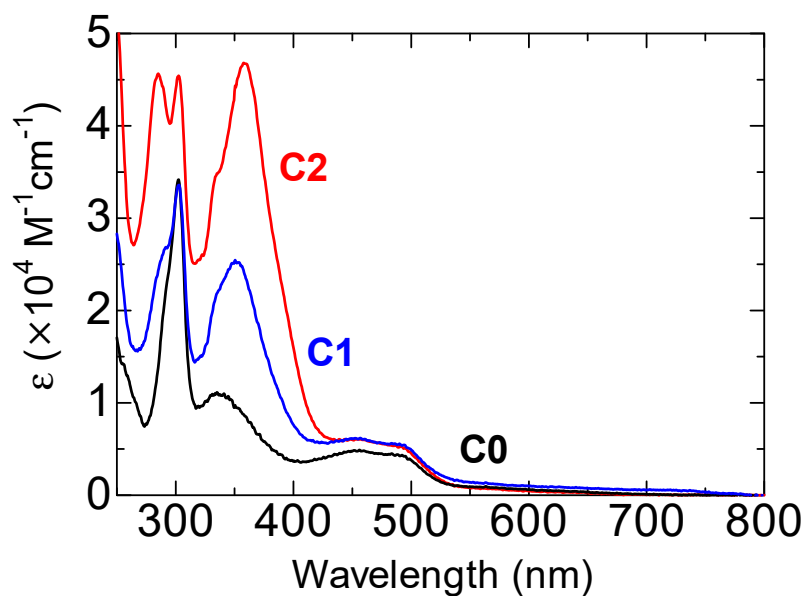

Figure S1. UV-Vis absorption spectra of **C0** (black), **C1** (blue) and **C2** (red). (10  $\mu\text{M}$ ,  $\text{HClO}_4$  aq. (pH = 1.0)/TFE/acetonitrile (v/v/v=3/2/1))

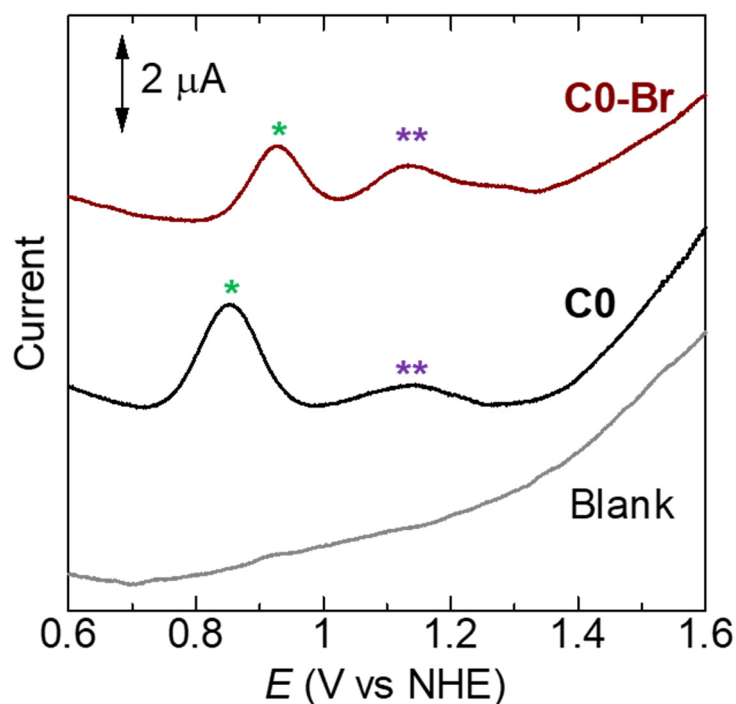

Figure S2. DPV curves of complexes **C0** (black), **C0-Br** (brown) in pH = 1.0  $\text{HClO}_4$  aq. /2,2,2-trifluoroethanol(TFE)/ acetonitrile (v/v/v = 3/2/1) containing 0.1 M  $\text{NaClO}_4$ . Scan rate:  $10 \text{ mVs}^{-1}$ . \* and \*\* are denoted as a redox peak of  $\text{Ru}^{\text{III/II}}$  and  $\text{Ru}^{\text{IV/III}}$ , respectively.

(a)

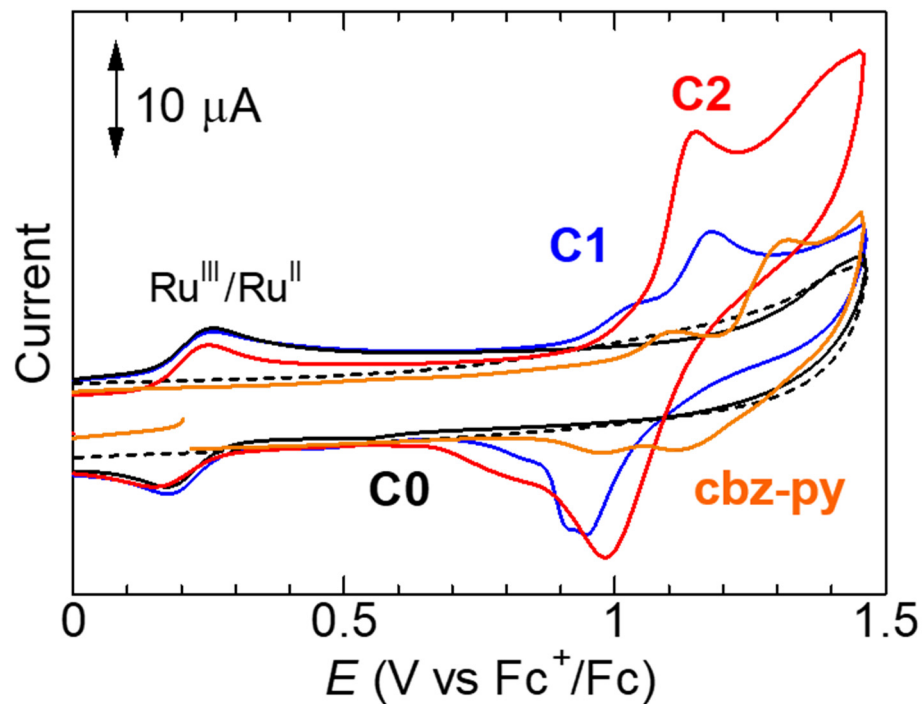

(b)

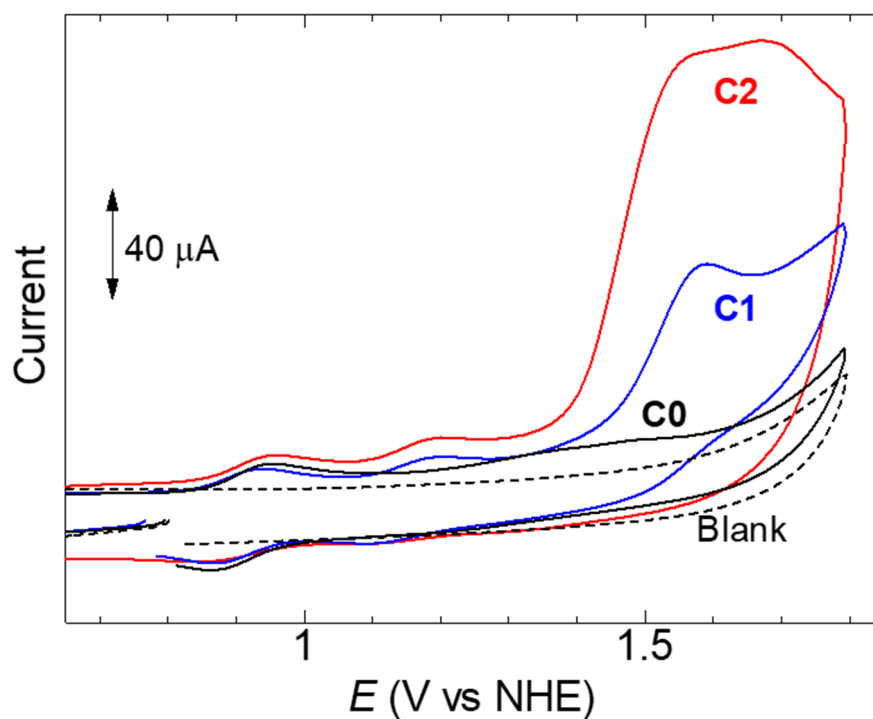

Figure S3. Cyclic voltammograms of **C0**, **C1**, **C2**, and **cbz-py** in (a) dichloromethane/TFE(v/v=9/1) (200  $\mu\text{M}$ , scan rate 100  $\text{mVs}^{-1}$ ) and (b)  $\text{HClO}_4$  aq. (pH = 1.0)/TFE/acetonitrile (v/v/v=1/2/1) (200  $\mu\text{M}$ , scan rate 100  $\text{mVs}^{-1}$ ).

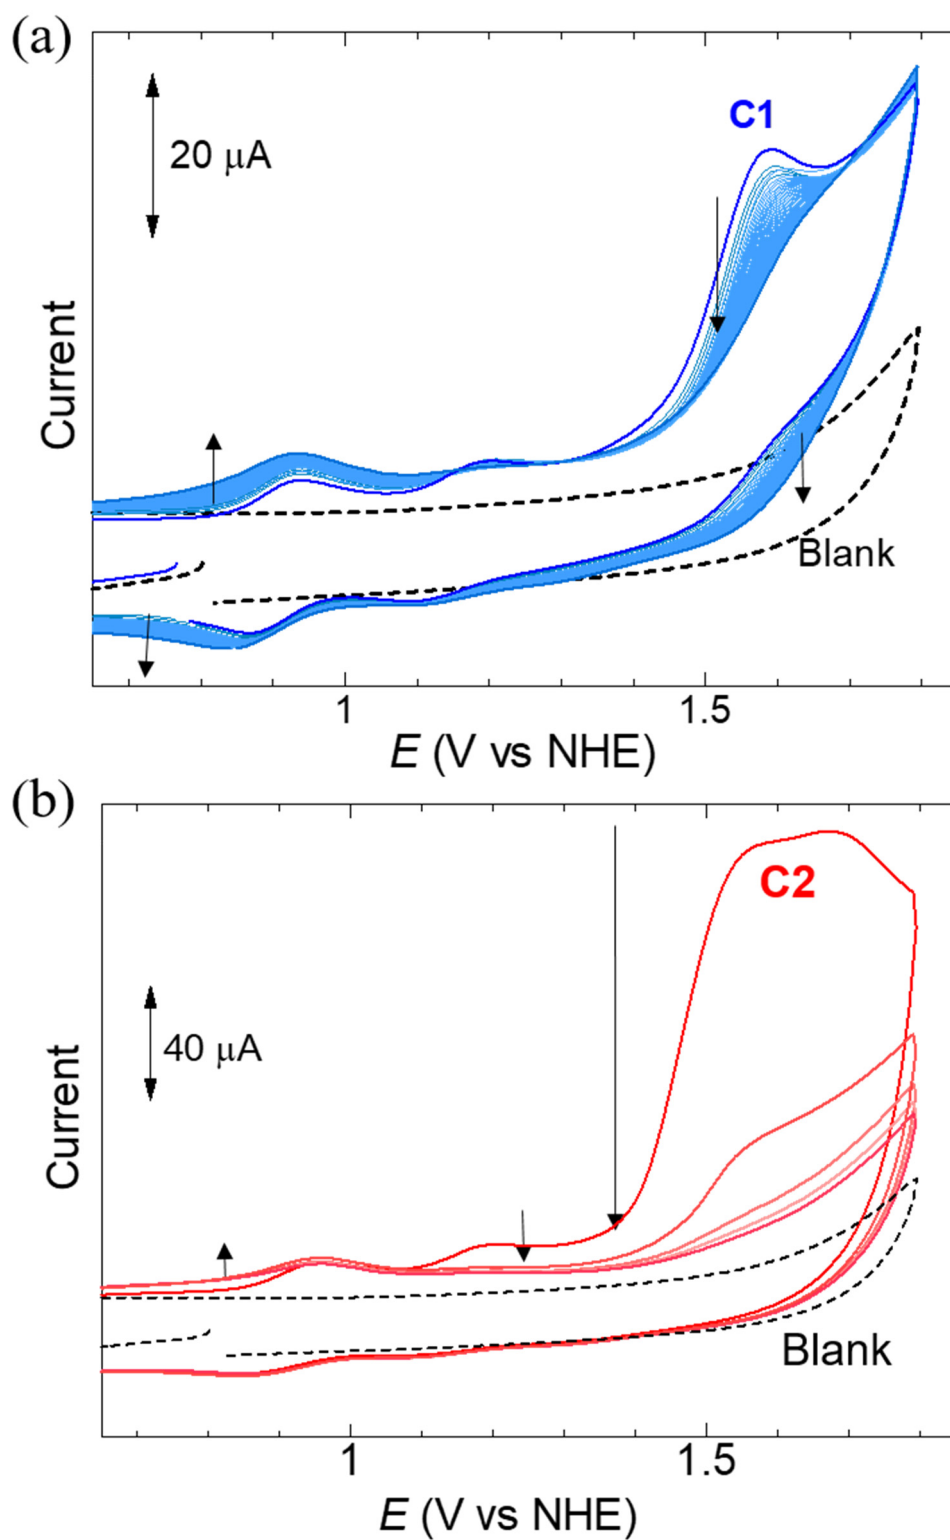

Figure S4. Changes of cyclic voltammograms during potential sweep cycles of (a) C1 (1-50<sup>th</sup> cycles) and (b) C2 (1-5<sup>th</sup> cycles). (200  $\mu\text{M}$ , 0.1 M  $\text{NaClO}_4$  solution of  $\text{HClO}_4$  aq(pH=1.0)/TFE/acetonitrile (v/v/v=1/2/1) mixture).

Table S1. MO energies of each complex estimated by DFT calculation.

|        | <b>C0 (eV)</b> | <b>C1 (eV)</b> | <b>C2 (eV)</b> |
|--------|----------------|----------------|----------------|
| LUMO+6 |                |                | -0.9293        |
| LUMO+5 | -0.7301        | -0.9178        | -0.9301        |
| LUMO+4 | -1.2849        | -1.3331        | -1.4504        |
| LUMO+3 | -1.3396        | -1.4468        | -1.4803        |
| LUMO+2 | -1.5543        | -1.5856        | -1.6172        |
| LUMO+1 | -1.8071        | -1.8381        | -1.8653        |
| LUMO   | -2.3301        | -2.3535        | -2.3742        |
| HOMO   | -4.8747        | -4.9008        | -4.9247        |
| HOMO-1 | -5.2055        | -5.2211        | -5.2311        |
| HOMO-2 | -5.4483        | -5.4426        | -5.4347        |
| HOMO-3 | -6.1620        | -5.8314        | -5.8249        |
| HOMO-4 | -6.2350        | -6.0760        | -5.8630        |
| HOMO-5 | -6.6034        | -6.1933        | -6.0875        |
| HOMO-6 | -6.7389        |                | -6.0875        |

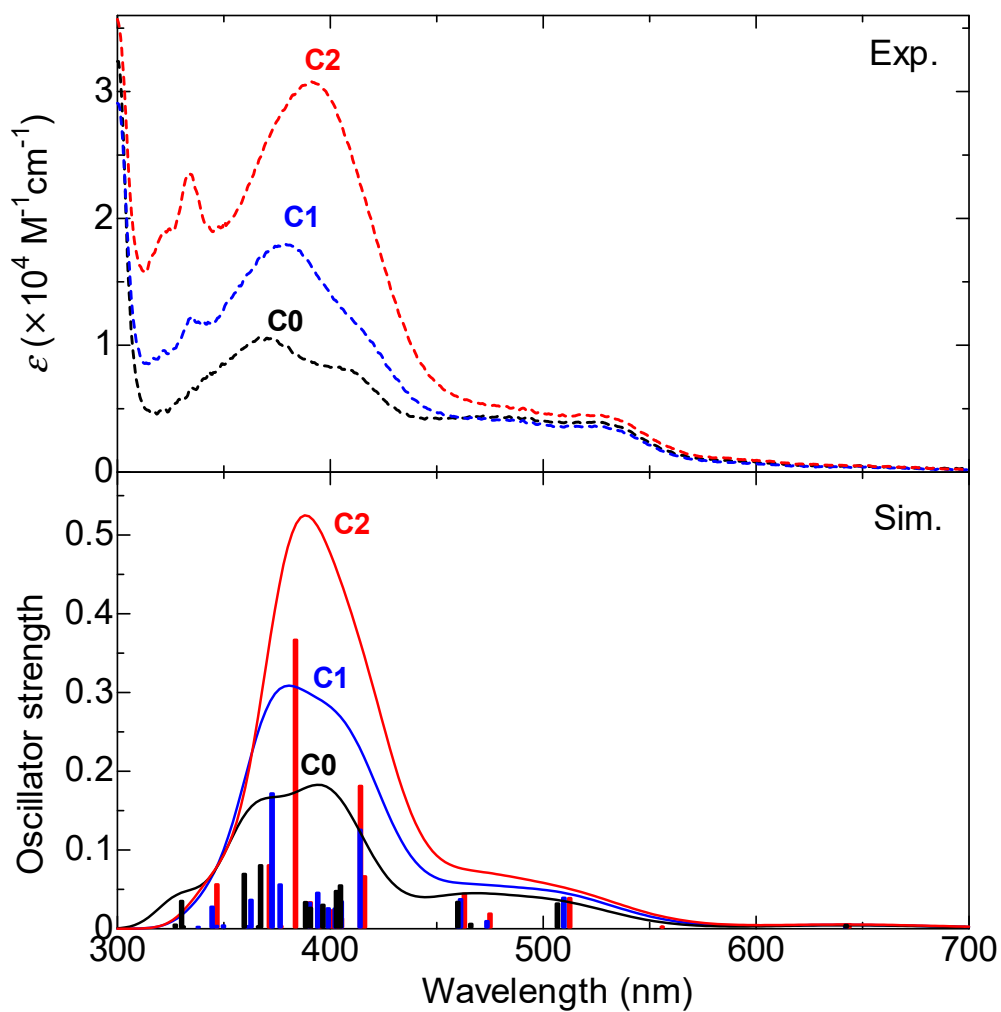

Figure S5. Comparison with (top) experimental spectra in dichloromethane/methanol ( $v/v=9/1$ ) and (bottom) simulated absorption spectra by TD-DFT calculations of **C0** (black), **C1** (blue) and **C2** (red). The values of calculated oscillator strength are plotted as bar charts.

Table S2. Wavelength, oscillator strength ( $f$ ), and contributions of major spin-allowed transitions ( $f > 0.01$ ) of **C0**.

| No. | $\lambda$ (nm) | $f$    | Contributions   | (%) | Assignment                                     |
|-----|----------------|--------|-----------------|-----|------------------------------------------------|
| 1   | 507.05         | 0.0316 | HOMO-2 ->LUMO   | 77  | MLCT : Ru(d) -> bda( $\pi^*$ )                 |
|     |                |        | HOMO-1 ->LUMO+2 | 15  |                                                |
| 2   | 460.21         | 0.0338 | HOMO-1 ->LUMO+1 | 93  | MLCT : Ru(d) -> bda( $\pi^*$ )                 |
| 3   | 405.18         | 0.0547 | HOMO-2 ->LUMO+1 | 7   | MLCT : Ru(d) -> bda( $\pi^*$ ) + py( $\pi^*$ ) |
|     |                |        | HOMO-1 ->LUMO+2 | 55  |                                                |
|     |                |        | HOMO-1 ->LUMO+4 | 30  |                                                |
| 4   | 403.22         | 0.0476 | HOMO-2 ->LUMO+2 | 14  | MLCT : Ru(d) -> py( $\pi^*$ )                  |
|     |                |        | HOMO-2 ->LUMO+4 | 11  |                                                |
|     |                |        | HOMO-1 ->LUMO+3 | 60  |                                                |
|     |                |        | HOMO ->LUMO+9   | 11  |                                                |
| 5   | 396.85         | 0.0300 | HOMO-2 ->LUMO+2 | 47  | MLCT : Ru(d) -> bda( $\pi^*$ )                 |
|     |                |        | HOMO-1 ->LUMO+3 | 27  |                                                |
|     |                |        | HOMO ->LUMO+9   | 20  |                                                |
| 6   | 390.99         | 0.0262 | HOMO-2 ->LUMO   | 7   | MLCT : Ru(d) -> py( $\pi^*$ )                  |
|     |                |        | HOMO-2 ->LUMO+1 | 6   |                                                |
|     |                |        | HOMO-2 ->LUMO+3 | 48  |                                                |
|     |                |        | HOMO-1 ->LUMO+2 | 10  |                                                |
|     |                |        | HOMO-1 ->LUMO+4 | 20  |                                                |
|     |                |        | HOMO ->LUMO+8   | 6   |                                                |
| 7   | 388.7          | 0.0335 | HOMO-2 ->LUMO+2 | 29  | MC : Ru(d) -> Ru(d)                            |
|     |                |        | HOMO ->LUMO+9   | 60  |                                                |
| 8   | 367.63         | 0.0802 | HOMO-2 ->LUMO+4 | 71  | MLCT : Ru(d) -> py( $\pi^*$ )                  |
|     |                |        | HOMO-1 ->LUMO+3 | 8   |                                                |
|     |                |        | HOMO ->LUMO+6   | 18  |                                                |
| 9   | 359.95         | 0.0694 | HOMO-2 ->LUMO+4 | 14  | MLCT : Ru(d) -> py( $\pi^*$ )                  |
|     |                |        | HOMO ->LUMO+6   | 78  |                                                |
| 10  | 330.48         | 0.0349 | HOMO-6 ->LUMO   | 85  | LC : bda( $\pi$ ) -> bda( $\pi^*$ )            |
|     |                |        | HOMO-1 ->LUMO+6 | 8   |                                                |



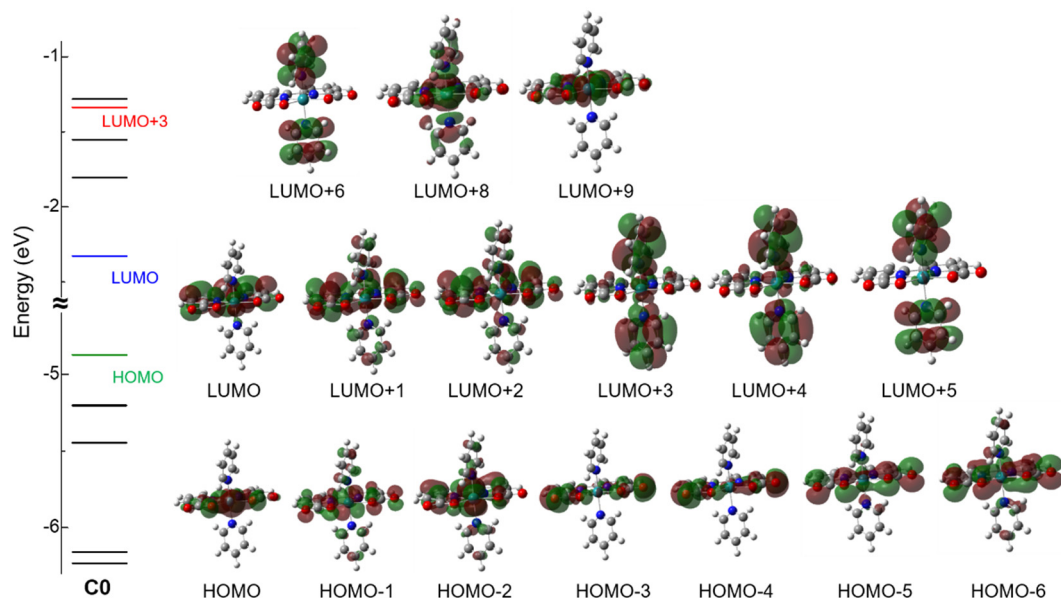

Figure S6. Schematic molecular orbital diagrams and orbital shapes of **C0** in the ground  $S_0$  state.

Table S3. Wavelength, oscillator strength ( $f$ ), and contributions of major spin-allowed transitions ( $f > 0.01$ ) of **C1**.

| No. | $\lambda$ (nm) | $f$    | Contributions <sup>a</sup> |           | (%) | Assignment                                          |
|-----|----------------|--------|----------------------------|-----------|-----|-----------------------------------------------------|
| 1   | 510.05         | 0.0390 | HOMO-2                     | ->LUMO    | 76  | MLCT : Ru(d) -> bda( $\pi^*$ )                      |
|     |                |        | HOMO-1                     | ->LUMO+2  | 12  |                                                     |
| 2   | 461.48         | 0.0371 | HOMO-1                     | ->LUMO+1  | 93  | MLCT : Ru(d) -> bda( $\pi^*$ )                      |
| 3   | 414.35         | 0.1253 | HOMO-1                     | ->LUMO+2  | 45  | MLCT :<br>Ru(d) -> bda( $\pi^*$ )+cbz-py( $\pi^*$ ) |
|     |                |        | HOMO-1                     | ->LUMO+3  | 38  |                                                     |
|     |                |        | HOMO-3                     | ->LUMO    | 10  |                                                     |
|     |                |        | HOMO-2                     | ->LUMO+3  | 10  |                                                     |
| 4   | 405.51         | 0.0342 | HOMO-1                     | ->LUMO+2  | 17  | MLCT : Ru(d) -> cbz-py( $\pi^*$ )                   |
|     |                |        | HOMO-1                     | ->LUMO+3  | 21  |                                                     |
|     |                |        | HOMO-1                     | ->LUMO+4  | 23  |                                                     |
|     |                |        | HOMO-3                     | ->LUMO    | 48  |                                                     |
| 5   | 402.61         | 0.0252 | HOMO-2                     | ->LUMO+2  | 10  | LLCT : cbz-py( $\pi$ ) -> bda( $\pi^*$ )            |
|     |                |        | HOMO-1                     | ->LUMO+4  | 21  |                                                     |
|     |                |        | HOMO-3                     | ->LUMO    | 9   |                                                     |
| 6   | 399.34         | 0.0257 | HOMO-2                     | ->LUMO+2  | 45  | MLCT :<br>Ru(d)+ bda( $\pi$ ) -> bda( $\pi^*$ )     |
|     |                |        | HOMO-1                     | ->LUMO+3  | 8   |                                                     |
|     |                |        | HOMO-1                     | ->LUMO+4  | 7   |                                                     |
|     |                |        | HOMO                       | ->LUMO+11 | 23  |                                                     |
| 7   | 394.44         | 0.0453 | HOMO-3                     | ->LUMO    | 26  | MLCT : Ru(d) -> cbz-py( $\pi^*$ )                   |
|     |                |        | HOMO-2                     | ->LUMO+3  | 33  |                                                     |
|     |                |        | HOMO-1                     | ->LUMO+2  | 6   |                                                     |
|     |                |        | HOMO-1                     | ->LUMO+4  | 16  |                                                     |
| 8   | 390.55         | 0.0323 | HOMO-2                     | ->LUMO+2  | 27  | MC : Ru(d) -> Ru(d)                                 |
|     |                |        | HOMO                       | ->LUMO+11 | 59  |                                                     |
| 9   | 376.75         | 0.0559 | HOMO-2                     | ->LUMO+3  | 15  | MLCT : Ru(d) -> cbz-py( $\pi^*$ )                   |
|     |                |        | HOMO-2                     | ->LUMO+4  | 16  |                                                     |
|     |                |        | HOMO                       | ->LUMO+6  | 58  |                                                     |
| 10  | 372.95         | 0.1714 | HOMO-2                     | ->LUMO+4  | 44  | MLCT :<br>Ru(d) -> py( $\pi^*$ )+cbz-py( $\pi^*$ )  |
|     |                |        | HOMO-1                     | ->LUMO+3  | 6   |                                                     |
|     |                |        | HOMO                       | ->LUMO+6  | 36  |                                                     |
| 11  | 363.07         | 0.0363 | HOMO                       | ->LUMO+7  | 90  | MLCT : Ru(d) -> py( $\pi^*$ )                       |

|    |        |        |        |          |    |                                          |
|----|--------|--------|--------|----------|----|------------------------------------------|
| 12 | 344.82 | 0.0275 | HOMO-7 | ->LUMO   | 8  | LLCT : cbz-py( $\pi$ ) -> bda( $\pi^*$ ) |
|    |        |        | HOMO-3 | ->LUMO+1 | 77 |                                          |

<sup>a</sup>Minor contributions (< 5%) are omitted.

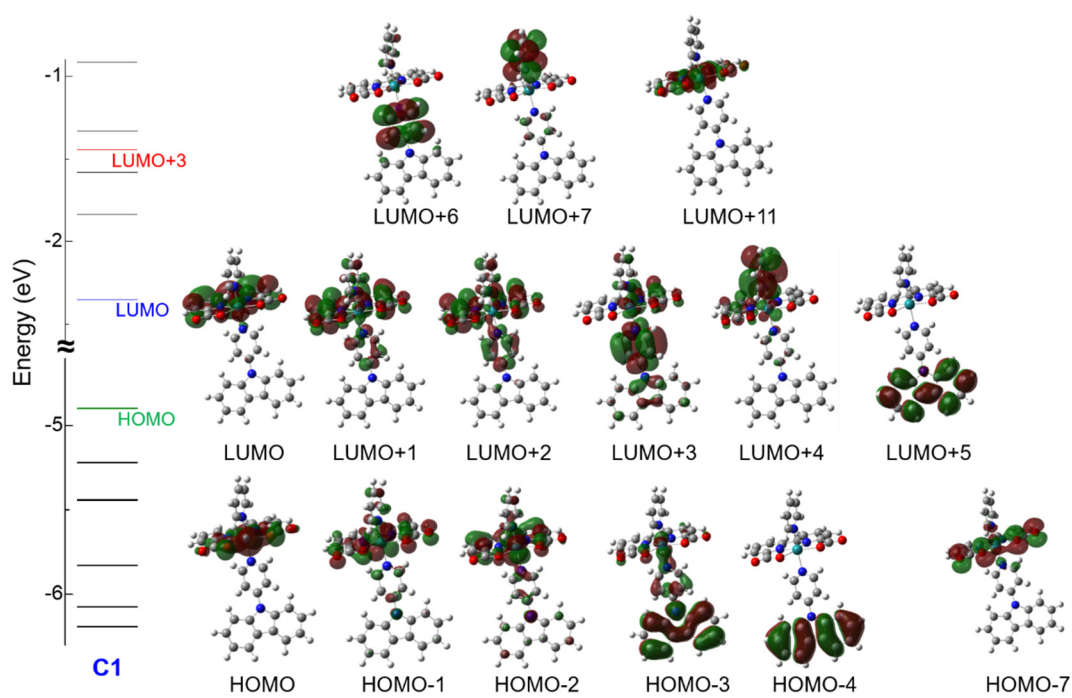

Figure S7. Schematic molecular orbital diagrams and orbital shapes of C1 in the ground  $S_0$  state.

Table S4. Wavelength, oscillator strength ( $f$ ), and contributions of major spin-allowed transitions ( $f > 0.01$ ) of **C2**.

| No. | $\lambda$ (nm) | $f$    | Contributions <sup>a</sup> |           | (%) | Assignment                                                                                  |
|-----|----------------|--------|----------------------------|-----------|-----|---------------------------------------------------------------------------------------------|
| 1   | 512.77         | 0.0385 | HOMO-2                     | ->LUMO    | 72  | MLCT : Ru(d) -> bda( $\pi^*$ )                                                              |
|     |                |        | HOMO-1                     | ->LUMO+2  | 10  |                                                                                             |
|     |                |        | HOMO-1                     | ->LUMO+4  | 7   |                                                                                             |
|     |                |        | HOMO                       | ->LUMO+2  | 6   |                                                                                             |
| 2   | 475.38         | 0.0189 | HOMO                       | ->LUMO+3  | 94  | MLCT : Ru(d) -> cbz-py( $\pi^*$ )                                                           |
| 3   | 463.32         | 0.0441 | HOMO-1                     | ->LUMO+1  | 93  | MLCT : Ru(d) -> cbz-py( $\pi^*$ )                                                           |
| 4   | 416.39         | 0.0664 | HOMO-2                     | ->LUMO+1  | 6   | MLCT : Ru(d) -> bda( $\pi^*$ )                                                              |
|     |                |        | HOMO-1                     | ->LUMO+2  | 68  |                                                                                             |
|     |                |        | HOMO-1                     | ->LUMO+4  | 19  |                                                                                             |
| 5   | 414.49         | 0.1811 | HOMO-2                     | ->LUMO+4  | 8   | MLCT : Ru(d) -> cbz-py( $\pi^*$ )                                                           |
|     |                |        | HOMO-1                     | ->LUMO+3  | 81  |                                                                                             |
| 6   | 405.54         | 0.0130 | HOMO-4                     | ->LUMO    | 34  | LLCT : cbz-py( $\pi$ ) -> bda( $\pi^*$ )<br>mixed with<br>MLCT : Ru(d) -> cbz-py( $\pi^*$ ) |
|     |                |        | HOMO-2                     | ->LUMO    | 10  |                                                                                             |
|     |                |        | HOMO-2                     | ->LUMO+3  | 20  |                                                                                             |
|     |                |        | HOMO-1                     | ->LUMO+4  | 22  |                                                                                             |
| 7   | 403.66         | 0.0125 | HOMO-3                     | ->LUMO    | 92  | LLCT : cbz-py( $\pi$ ) -> bda( $\pi^*$ )                                                    |
|     |                |        | HOMO-2                     | ->LUMO+2  | 60  |                                                                                             |
| 8   | 401.23         | 0.0229 | HOMO-1                     | ->LUMO+3  | 6   | MLCT : Ru(d) -> bda( $\pi^*$ )                                                              |
|     |                |        | HOMO                       | ->LUMO+13 | 20  |                                                                                             |
| 9   | 395.52         | 0.0236 | HOMO-4                     | ->LUMO    | 57  | LLCT : cbz-py( $\pi$ ) -> bda( $\pi^*$ )                                                    |
|     |                |        | HOMO-2                     | ->LUMO+3  | 28  |                                                                                             |
| 10  | 390.88         | 0.0332 | HOMO-2                     | ->LUMO+2  | 19  | MC : Ru(d) -> Ru(d)                                                                         |
|     |                |        | HOMO                       | ->LUMO+13 | 65  |                                                                                             |
| 11  | 383.99         | 0.3667 | HOMO-2                     | ->LUMO+2  | 6   | MLCT : Ru(d) -> cbz-py( $\pi^*$ )                                                           |
|     |                |        | HOMO-2                     | ->LUMO+4  | 82  |                                                                                             |
|     |                |        | HOMO-1                     | ->LUMO+3  | 6   |                                                                                             |
| 12  | 371.75         | 0.0802 | HOMO                       | ->LUMO+8  | 96  | MLCT : Ru(d) -> cbz-py( $\pi^*$ )                                                           |
| 13  | 347.08         | 0.0560 | HOMO-3                     | ->LUMO+1  | 90  | LLCT : cbz-py( $\pi$ ) -> bda( $\pi^*$ )                                                    |

<sup>a</sup>Minor contributions (< 5%) are omitted.

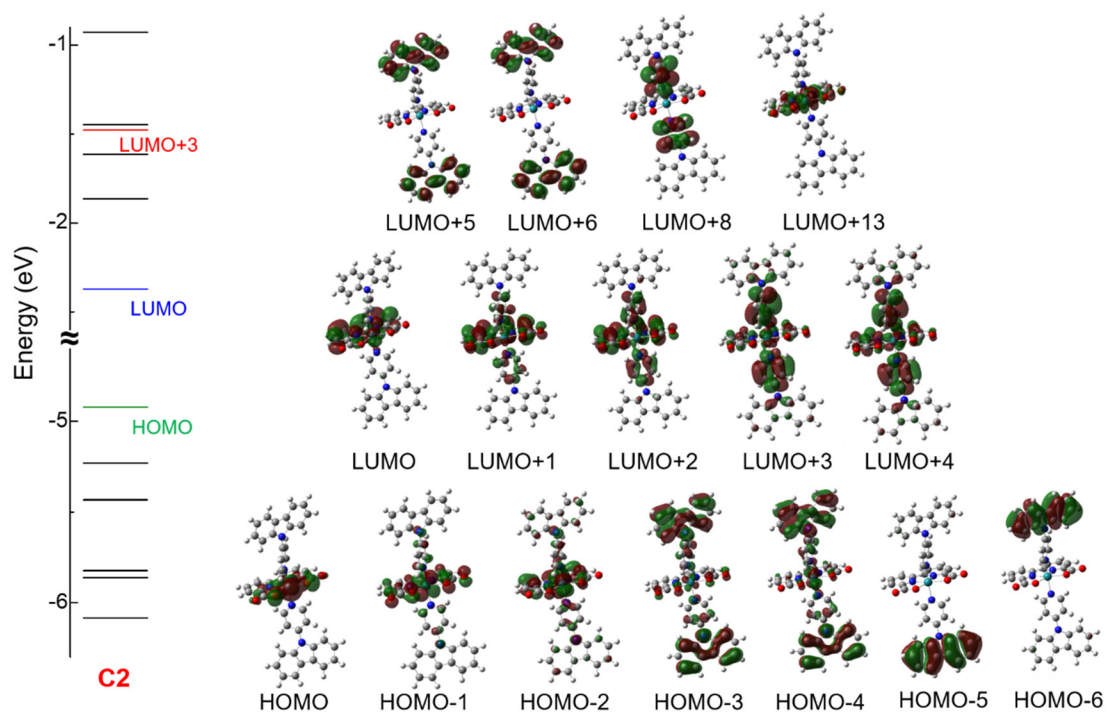

Figure S8. Schematic molecular orbital diagrams and orbital shapes of  $C_2$  in the ground  $S_0$  state.

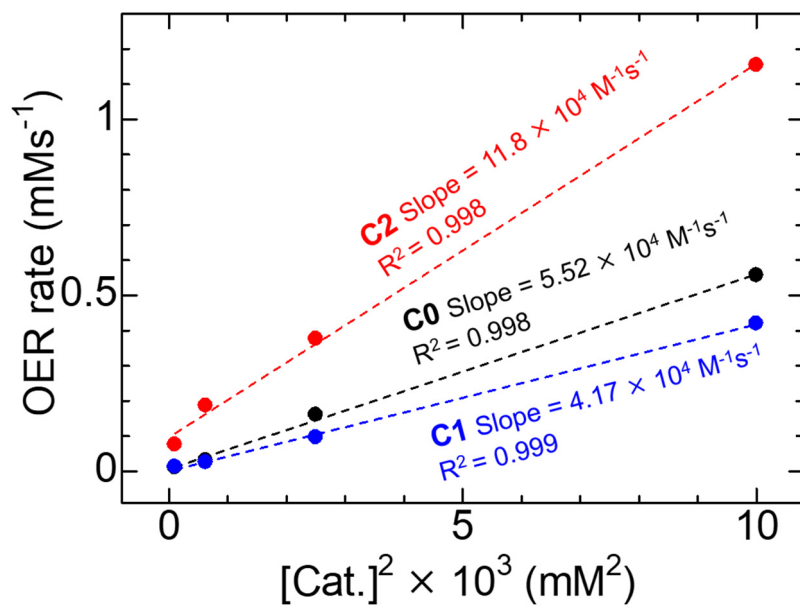

Figure S9. [Cat.] dependency of OER rate (= Evolved O<sub>2</sub> amount / Time) (Estimated from TOF<sub>max</sub>).

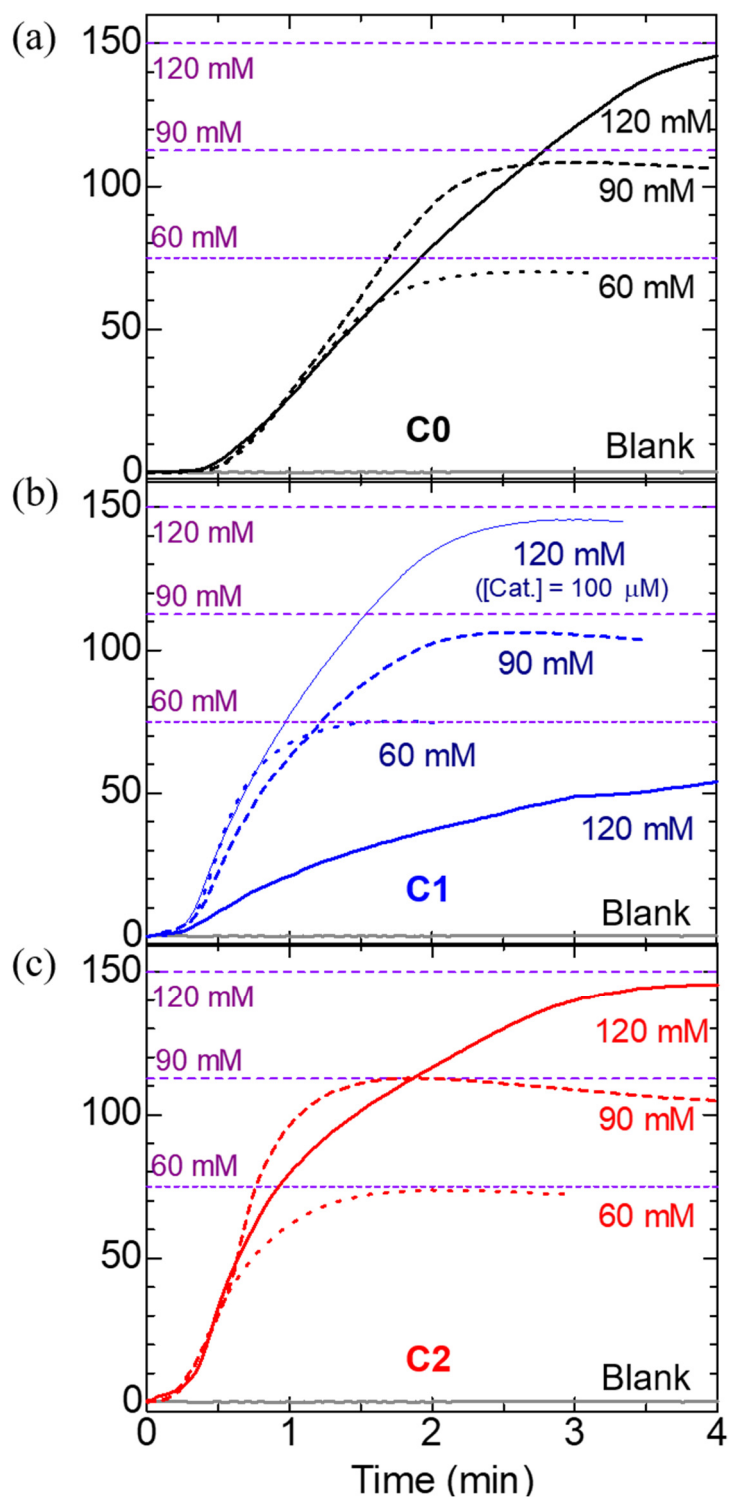

Figure S10. Chemical OER plots of (a) **C0** (b) **C1** (c) **C2** (50  $\mu\text{M}$ ) under  $[\text{CAN}] = 60\text{-}120$  mM.  $[\text{CAN}] = 120$  mM (bold lines), 90 mM (dashed lines) and 60 mM (dotted lines). Purple dashed lines in each panel show the calculated  $\text{O}_2$  amounts based on the amount of one-electron oxidant CAN.

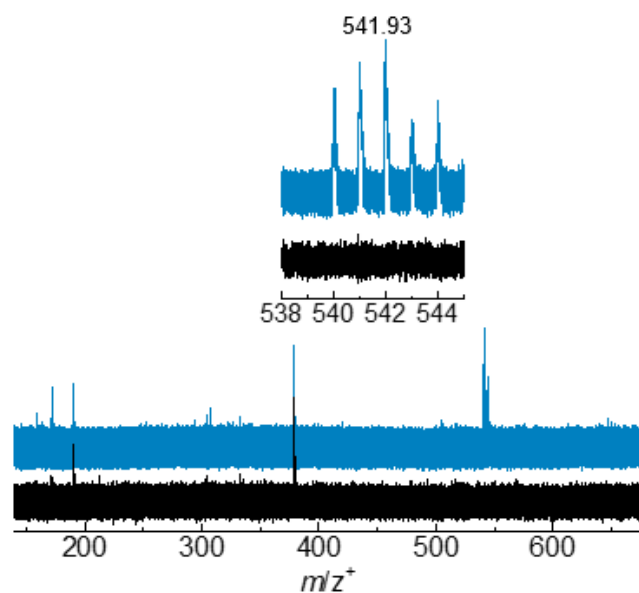

Figure S11. MALDI-MS spectra of the extract from the reaction mixture of **C1** ( $[\mathbf{C1}] = 25 \mu\text{M}$ ,  $[\text{CAN}] = 120 \text{ mM}$ , in  $\text{pH} = 1.0 \text{ HClO}_4 \text{ aq./TFE/acetonitrile}$  ( $v/v/v = 3/2/1$ )) by  $\text{CH}_2\text{Cl}_2$ . The spectrum without the extract was shown as black solid line. The inset is the magnification of the peak assignable to a Ru-containing species. The exact structure of this species is unclear, but the mass is larger than that of  $[\text{Ru}(\text{bda})(\text{py})_2]^+$  ( $m/z = 502$ ), implying the coordination of cbz-py ligand to the Ru-bda unit. No significant peak at  $m/z \sim 250$  assignable to the dissociated cbz-py species was observed.

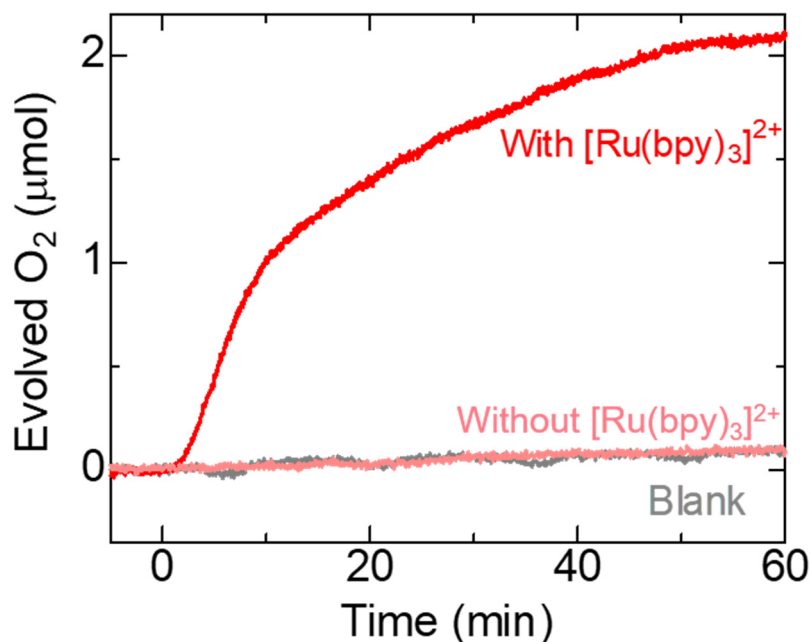

Figure S12. Photochemical OER plots of **C2** ( $10 \mu\text{M}$ ) without  $[\text{Ru}(\text{bpy})_3]^{2+}$  in borate buffer ( $10 \text{ mM}$ ,  $\text{pH} = 8.0$ )  $\text{aq./TFE/acetonitrile}$  ( $v/v/v = 3/2/1$ ).  $[\text{Cat.}] = 10 \mu\text{M}$ ,  $[\text{Na}_2\text{S}_2\text{O}_8] = 5 \text{ mM}$ ,  $\lambda = 470 \text{ nm}$ ,  $30 \text{ mWcm}^{-2}$ .



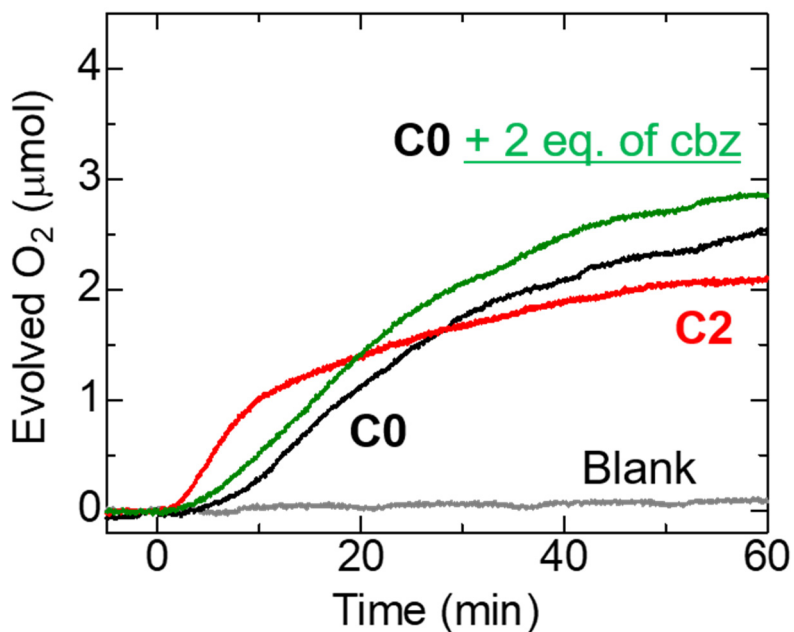

Figure S13. Photochemical OER plots of **C0** (10 μM) with cbz-H (20 μM) adduct.

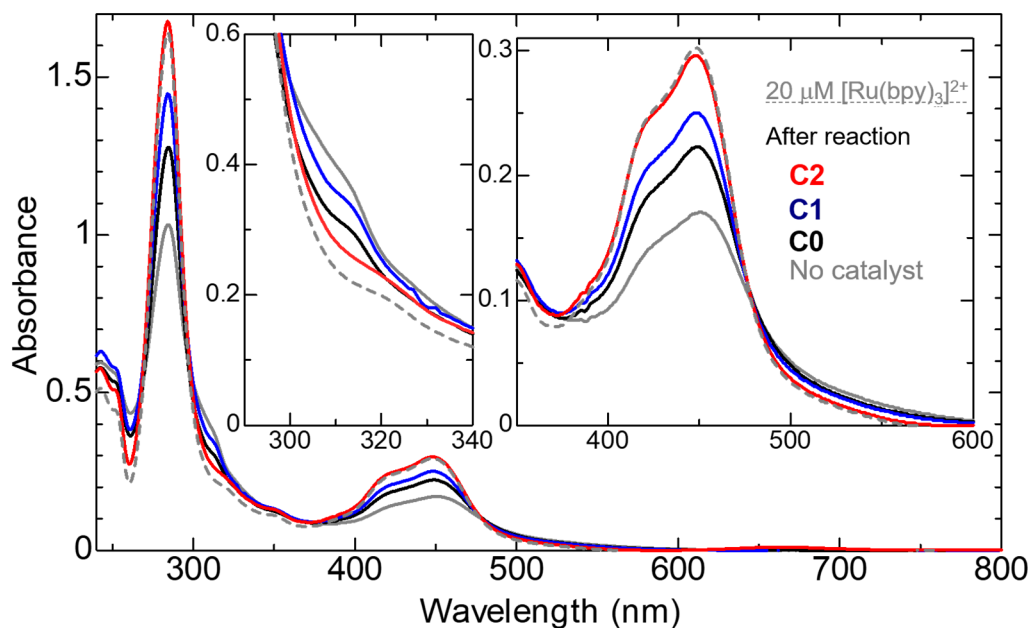

Figure S14. UV-Vis absorption spectra of reaction mixture after 1 h photolysis (solid line, red : **C2**, blue : **C1**, black : **C0** and no catalyst : gray. Diluted 10<sup>th</sup> fold.) and 20 μM[Ru(bpy)<sub>3</sub>]<sup>2+</sup> soln. (gray, dashed line, pH=8.0, bubbled for 30 min and stated in the dark for 1 h).

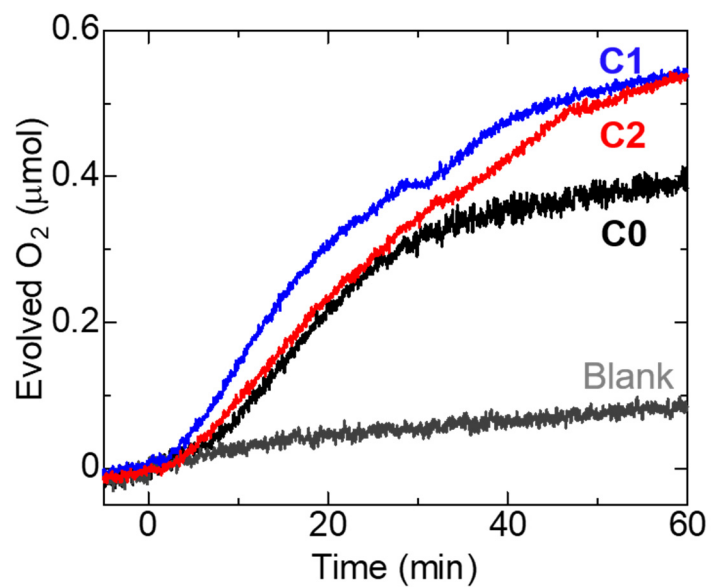

Figure S15. Photochemical OER plots of complexes **C0** (black), **C1** (blue) and **C2** (red) with Co<sup>III</sup> oxidant in acetate buffer (40 mM, pH=5.0) aq. / TFE / acetonitrile (v/v/v = 3/2/1). [Cat.] = 10 μM, [Ru(bpy)<sub>3</sub>]<sup>2+</sup> = 200 μM, ([CoCl(NH<sub>3</sub>)<sub>5</sub>]<sup>2+</sup> = 4 mM, λ = 470 nm, 30 mWcm<sup>-2</sup>.

(a)

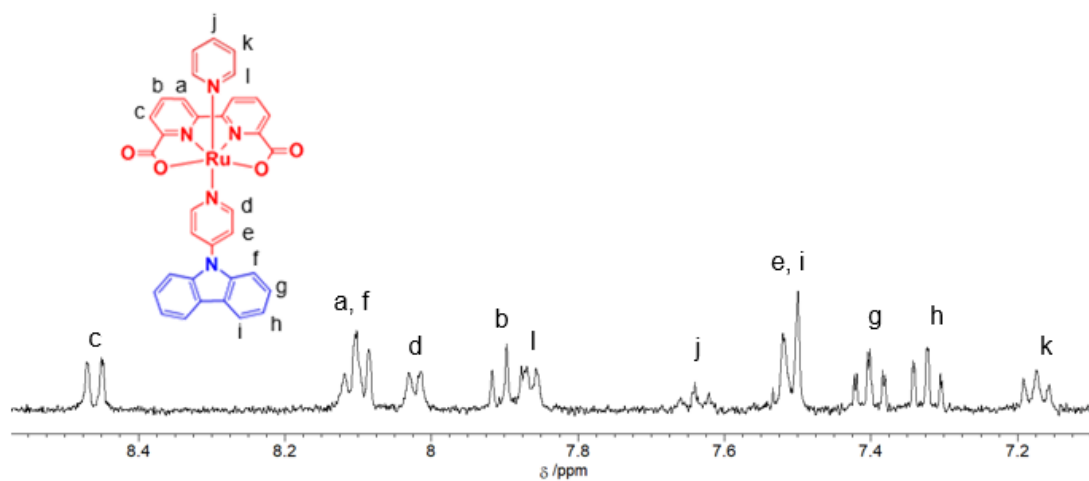

(b)

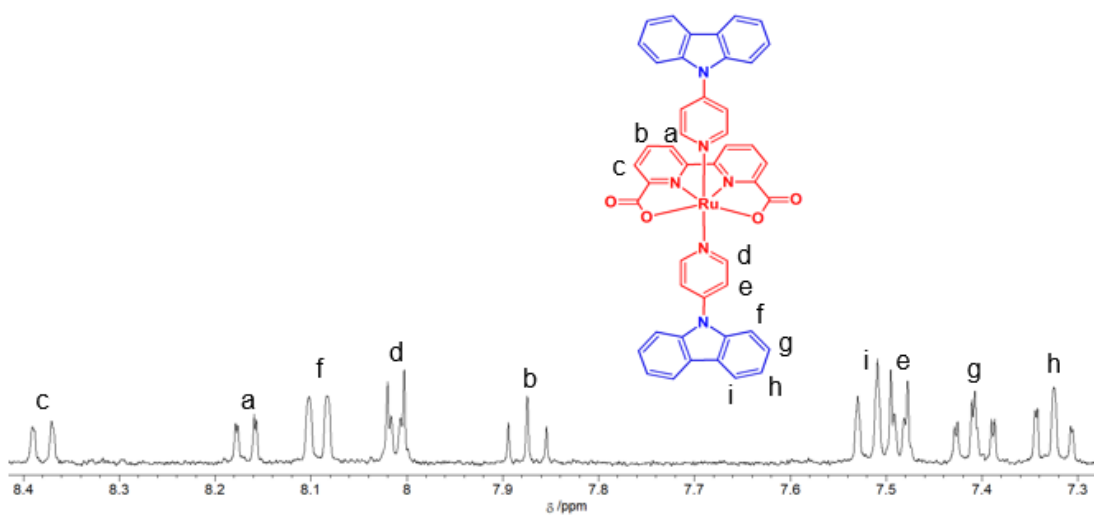

Figure S16. The aromatic region of  $^1\text{H}$  NMR spectra of (a) C1 and (b) C2. (400 MHz,  $\text{CD}_2\text{Cl}_2/\text{methanol-}d_4$  with a small amount of L-ascorbic acid)

Table S5. Crystallographic parameters of. **C2**·2CH<sub>2</sub>Cl<sub>2</sub>.

| Complex                                      | C2·2CH <sub>2</sub> Cl <sub>2</sub>                                                               |
|----------------------------------------------|---------------------------------------------------------------------------------------------------|
| <i>T</i> / K                                 | 150                                                                                               |
| Formula                                      | C <sub>46</sub> H <sub>30</sub> N <sub>6</sub> O <sub>4</sub> Ru·2CH <sub>2</sub> Cl <sub>2</sub> |
| Formula weight                               | 1001.68                                                                                           |
| Crystal system                               | <i>monoclinic</i>                                                                                 |
| Space group                                  | <i>P2<sub>1</sub>/n</i>                                                                           |
| <i>a</i> / Å                                 | 8.08230(10)                                                                                       |
| <i>b</i> / Å                                 | 25.8123(5)                                                                                        |
| <i>c</i> / Å                                 | 20.3078(3)                                                                                        |
| <i>α</i> / deg.                              | 90                                                                                                |
| <i>β</i> / deg.                              | 93.8950(10)                                                                                       |
| <i>γ</i> / deg.                              | 90                                                                                                |
| <i>V</i> / Å <sup>3</sup>                    | 4226.88(12)                                                                                       |
| <i>Z</i>                                     | 4                                                                                                 |
| <i>D</i> <sub>cal</sub> / g×cm <sup>-3</sup> | 1.574                                                                                             |
| Reflections collected                        | 32223                                                                                             |
| Unique reflections                           | 8639                                                                                              |
| GOF                                          | 1.100                                                                                             |
| <i>R</i> <sub>int</sub>                      | 0.0570                                                                                            |
| <i>R</i> ( <i>I</i> > 2.00s( <i>I</i> ))     | 0.0648                                                                                            |
| <i>R</i> <sub>w</sub> <sup>a</sup>           | 0.1679                                                                                            |

$$^a R_w = [\sum(w(F_o^2 - F_c^2)^2) / \sum w(F_o^2)^2]^{1/2}.$$

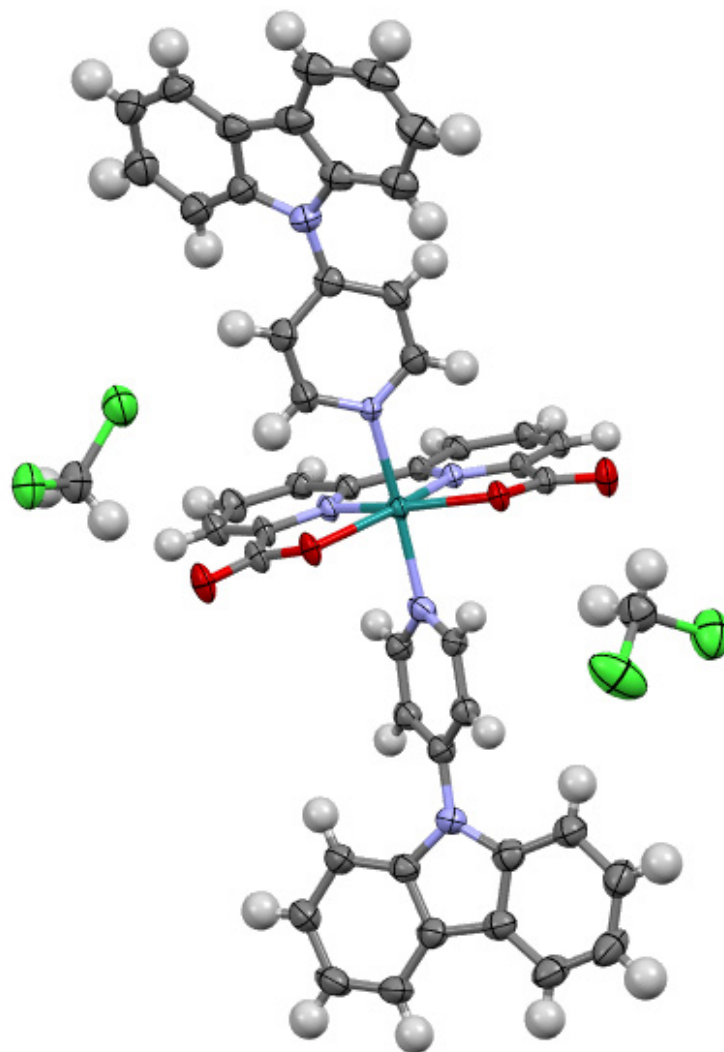

Figure S17. ORTEP drawings of.  $C_2 \cdot 2CH_2Cl_2$ . Thermal ellipsoids are shown at the 50% probability level. Color chart: grey: C, yellow green: Cl, white: H, purple: N, red: O, Green: Ru.
